# Supplementary material
Source: PubMed Central journal article supplement (PMC7476113)
Supplement: ajtr0012-4216-f8.pdf [file ajtr0012-4216-f8.pdf]

CEFFE promotes wound healing

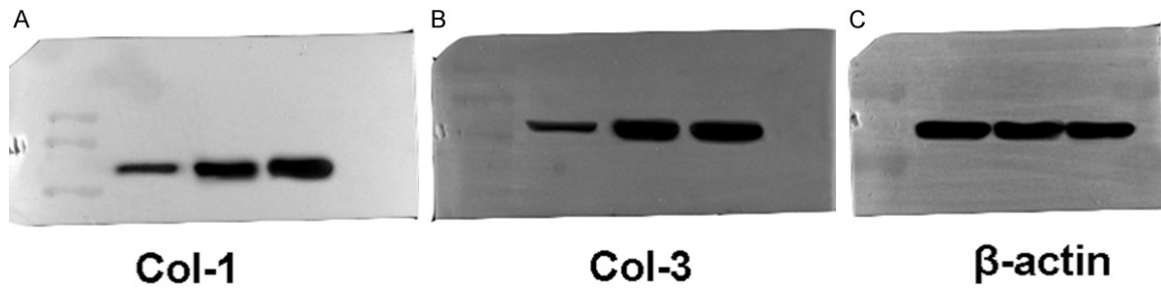

Supplemental Figure 1. Original western images of Col-1, Col-3 and  $\beta$ -actin.
